# Supplementary material for: Denosumab and incidence of type 2 diabetes among adults with osteoporosis: population based cohort study
Source: PubMed Central journal article supplement — BMJ. 2023 Apr 18;381:e073435. doi: 10.1136/bmj-2022-073435 (PMC10111187; doi:10.1136/bmj-2022-073435), 2023-04-18
Supplement: lyuh073435.ww.pdf [file lyuh073435.ww.pdf]

Supplementary materials for

**Denosumab and incidence of type 2 diabetes among adults with osteoporosis:  
population based cohort study**

# Contents

|                                                                                                                                                                                                              |           |
|--------------------------------------------------------------------------------------------------------------------------------------------------------------------------------------------------------------|-----------|
| <b>Supplemental Figure 1</b> Results of incident type 2 diabetes from randomized controlled trials with denosumab .....                                                                                      | <b>4</b>  |
| <b>Supplemental Figure 2</b> Study design.....                                                                                                                                                               | <b>5</b>  |
| <b>Supplemental Figure 3</b> Directed acyclic graph (DAG) of the study question.....                                                                                                                         | <b>6</b>  |
| <b>Supplemental Figure 4</b> The modified new user design with time-based exposure sets .....                                                                                                                | <b>7</b>  |
| <b>Supplemental Figure 5</b> Propensity score distribution of the study groups.....                                                                                                                          | <b>8</b>  |
| <b>Supplemental Method</b> Matching procedure and sensitivity analyses.....                                                                                                                                  | <b>9</b>  |
| <b>Supplemental Table 1</b> Specification and emulation of a target trial comparing switching to denosumab or continuing an oral bisphosphonate on the risk of type 2 diabetes using observational data..... | <b>11</b> |
| <b>Supplemental Table 2</b> Baseline characteristics of the study population before matching.....                                                                                                            | <b>12</b> |
| <b>Supplemental Table 3</b> Baseline characteristics comparison between the incident and prevalent new users of denosumab .....                                                                              | <b>14</b> |
| <b>Supplemental Table 4</b> Average treatment effect (ATE) and average treatment effect in those treated (ATT) in a subpopulation of incident new users .....                                                | <b>16</b> |
| <b>Supplemental Table 5</b> Sensitivity analysis with an alternative definition of type 2 diabetes by laboratory tests only.....                                                                             | <b>17</b> |
| <b>Supplemental Table 6</b> Subgroup analyses stratified by prior bisphosphonate exposure .....                                                                                                              | <b>18</b> |
| <b>Supplemental Table 7</b> Sensitivity analysis by excluding patients with preexisting peptic ulcer diseases or renal diseases .....                                                                        | <b>19</b> |
| <b>Supplemental Table 8</b> Sensitivity analysis restricting the patient only to those switched within 12 months of oral bisphosphonates .....                                                               | <b>20</b> |
| <b>Supplemental Table 9</b> Sensitivity analysis by extending the follow-up length to 10 years .....                                                                                                         | <b>21</b> |
| <b>Supplemental Table 10</b> Sensitivity analysis only includes those with a medication possession ratio (MPR) $\geq 0.8$ .....                                                                              | <b>22</b> |

|                                                                                                                                                           |           |
|-----------------------------------------------------------------------------------------------------------------------------------------------------------|-----------|
| <b>Supplemental Table 11</b> Sensitivity analysis using drug discontinuation defined by a gap over 360 days between successive prescriptions .....        | <b>23</b> |
| <b>Supplemental Table 12</b> Sensitivity analysis using alendronate as the comparator (switching to denosumab vs. continuing alendronate).....            | <b>24</b> |
| <b>Supplemental Table 13</b> Sensitivity analysis using an observational analogous intention to treat approach .....                                      | <b>25</b> |
| <b>Supplemental Table 14</b> Sensitivity analysis with multiple imputations for incomplete data.....                                                      | <b>26</b> |
| <b>Supplemental Table 15</b> Sensitivity analysis with more proxies of general health status .....                                                        | <b>27</b> |
| <b>Supplemental Table 16</b> Sensitivity analysis of using inverse probability weighting to address potentially unbalanced censoring between groups ..... | <b>28</b> |
| <b>Supplemental Table 17</b> Sensitivity analysis with pure switcher design, exclusively including participants treated with bisphosphonates .....        | <b>29</b> |
| <b>Supplemental Table 18</b> Incidence rate of type 2 diabetes at 1 to 5 years follow-up.                                                                 | <b>30</b> |
| <b>Supplemental Table 19</b> Diagnostic codes list of type 2 diabetes.....                                                                                | <b>31</b> |
| <b>Supplemental References</b> .....                                                                                                                      | <b>34</b> |

A. All osteoporosis RCTs

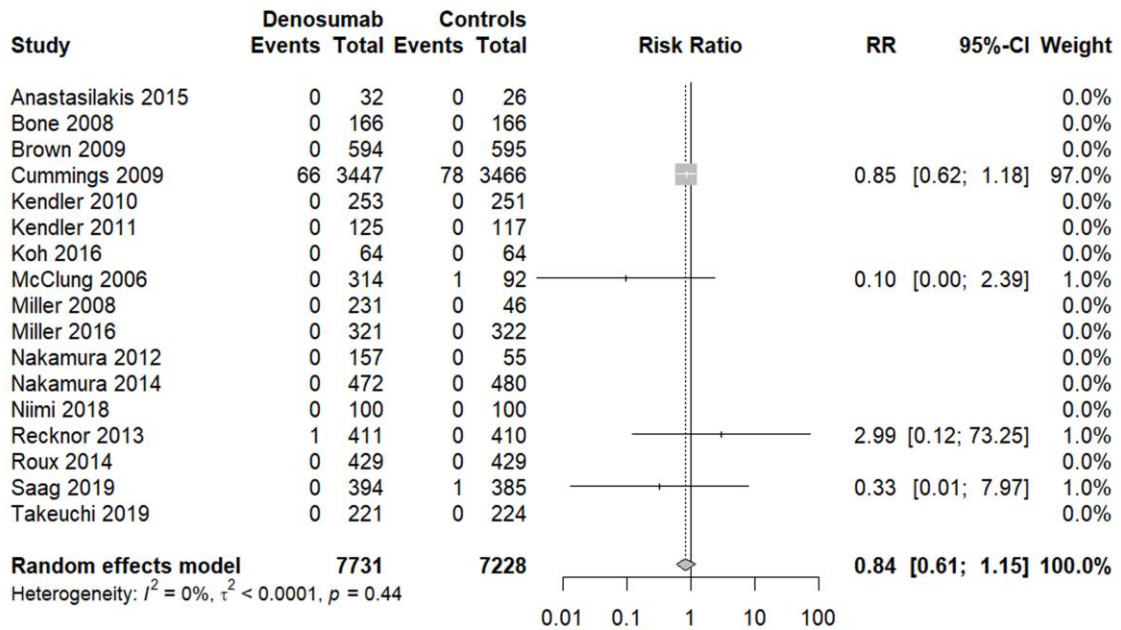

B. FREEDOM Study

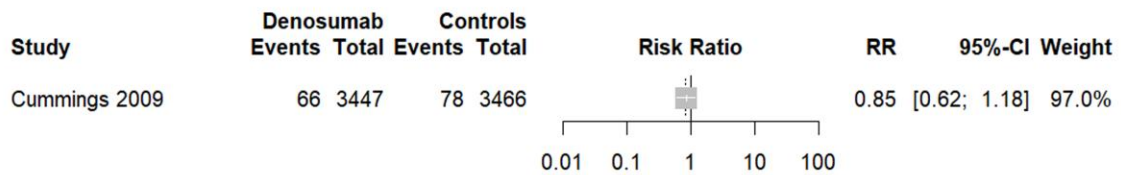

**Supplemental Figure 1 Results of incident type 2 diabetes from randomized controlled trials with denosumab**

The majority of randomized clinical trials (RCTs) involving denosumab have reported no cases of type 2 diabetes, with controls comprising both active comparators and placebos. FREEDOM, the Fracture Reduction Evaluation of Denosumab in Osteoporosis Every 6 Months (FREEDOM) trial.

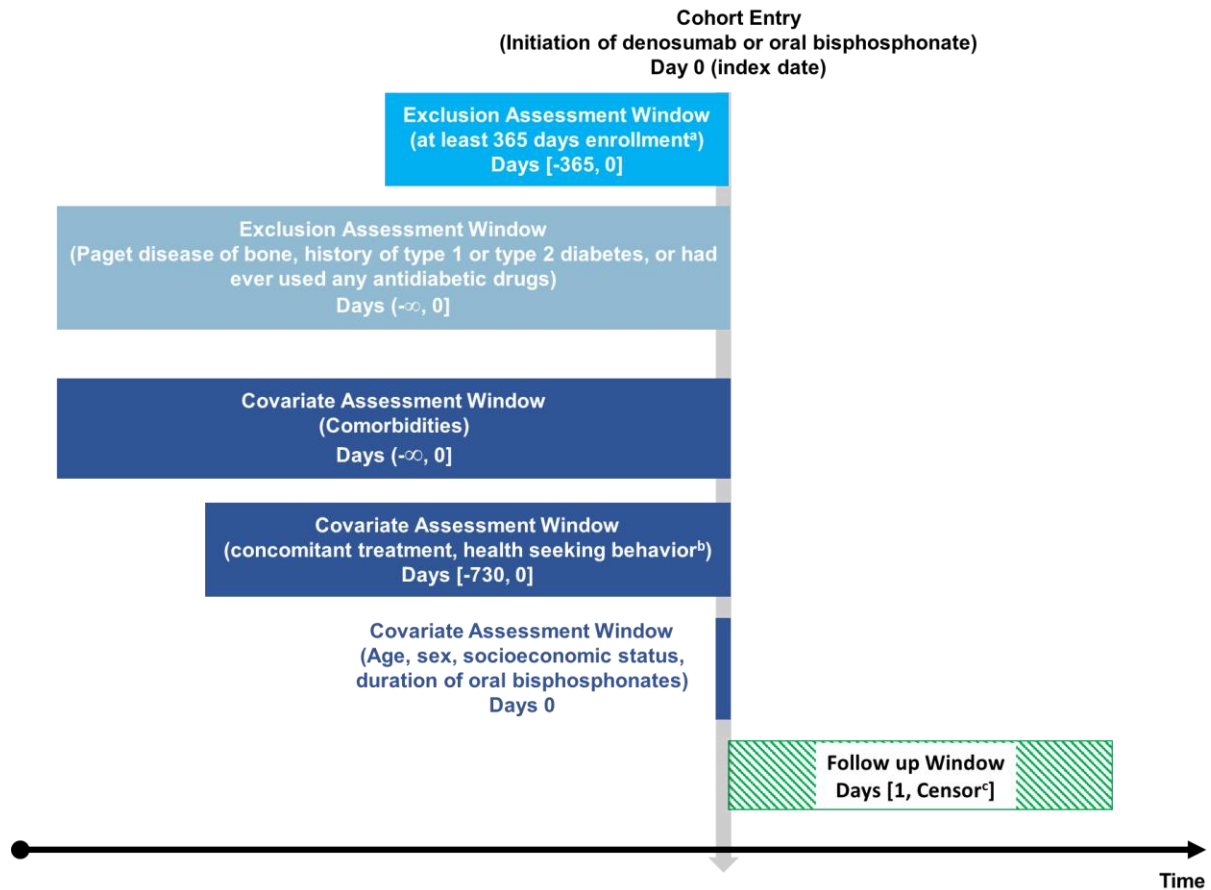

- a. Patients were required to have been enrolled for at least 365 days.
- b. Health seeking behavior was proxied by number of hospital admission and physician visits.
- c. Earliest of: study outcome (type 2 diabetes), discontinuation of drug of interest, death, transfer out of primary care clinic, 5 years follow-up, or end of the study period (31 December 2021).

**Supplemental Figure 2 Study design**

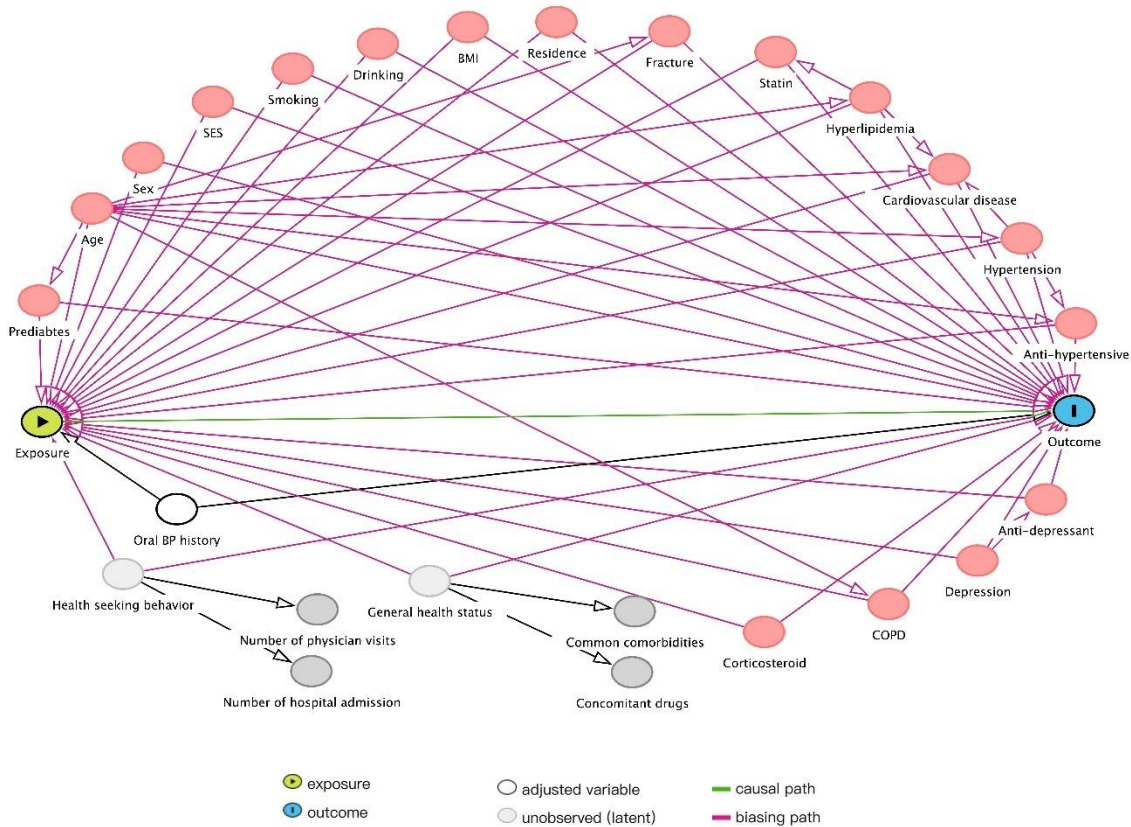

**Supplemental Figure 3 Directed acyclic graph (DAG) of the study question**

Illustration of the casual framework with a Directed Acyclic Graph (DAG). We considered a wide range of potential confounders. Our rationale for selecting potential confounders focused on variables associated with type 2 diabetes, which may also be associated with the drug of interest, based on current literature and subject matter expertise[1]. We included the following covariates measured at the index date: age, sex, smoking status, alcohol consumption status, body mass index (BMI), socioeconomic deprivation index (Townsend score), residence status, duration of oral bisphosphonate treatment, history of major osteoporotic fracture, comorbidities (cardiovascular disease, hypertension, hypercholesterolemia, chronic obstructive pulmonary disease[2], depression[3], prediabetes[4]), and concomitant treatment (antihypertensive, statin, glucocorticoid, and antidepressant[5]). We considered general health status as a potential unmeasured confounder and used common comorbidities (dementia, chronic heart failure, congestive heart disease, peripheral vascular disease, other circulation diseases, venous thromboembolism, anxiety, peptic ulcer disease, renal disease, and cancer) and related concomitant drugs (non-steroidal anti-inflammatory drug, aspirin, oral anticoagulant, and proton pump inhibitor) as proxies. We also included markers of health seeking behavior, using the number of hospital admissions and visits to doctors as proxies. Oral BP history was adjusted by design. General health status and health seeking behavior were unobserved, and proxies were used. Other variables indicated with red note were adjusted in propensity score model. The DAG was plotted with DAGitty[6]. BP, bisphosphonate; SES, socioeconomic deprivation index (Townsend score); BMI, body mass index; COPD, chronic obstructive pulmonary disease.

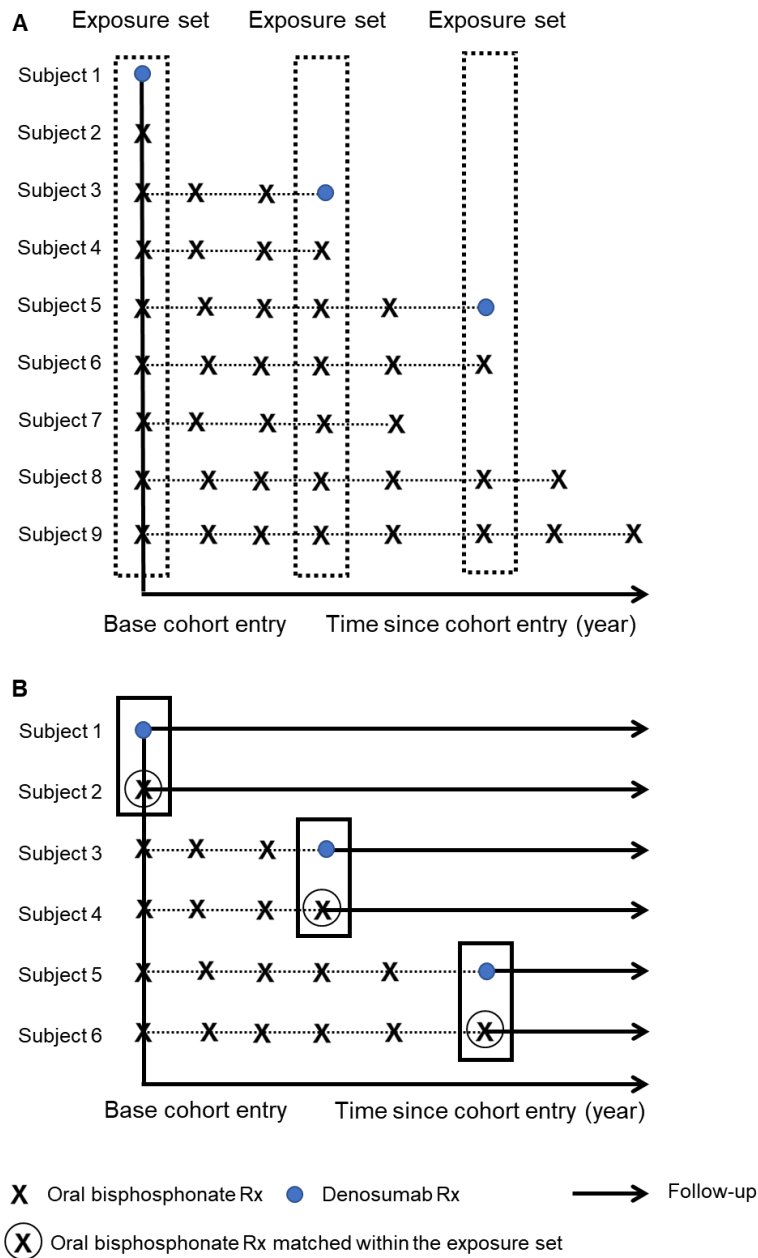

**Supplemental Figure 4 The modified new user design with time-based exposure sets**

Depiction of the modified new user design with six patients. Each denosumab initiator was matched to oral bisphosphonate users within each exposure set (cluster) using propensity scores. A. The time-based exposure set was defined by a small-time interval (2 months) surrounding the timing of the denosumab prescription (depicted in the dotted box). B. Incident new user of denosumab (subject 1) was matched to incident new users of oral bisphosphonate (subject 2) who initiated treatment in the same period in their exposure set. Subjects who switched to denosumab from an oral bisphosphonate (oral bisphosphonate switchers, subjects 3 and 5) were matched to subjects who had been using oral bisphosphonates for the same duration (subjects 4 and 6) with the closest propensity score. Rx, prescriptions. This figure was adapted from previous literature [7,8].

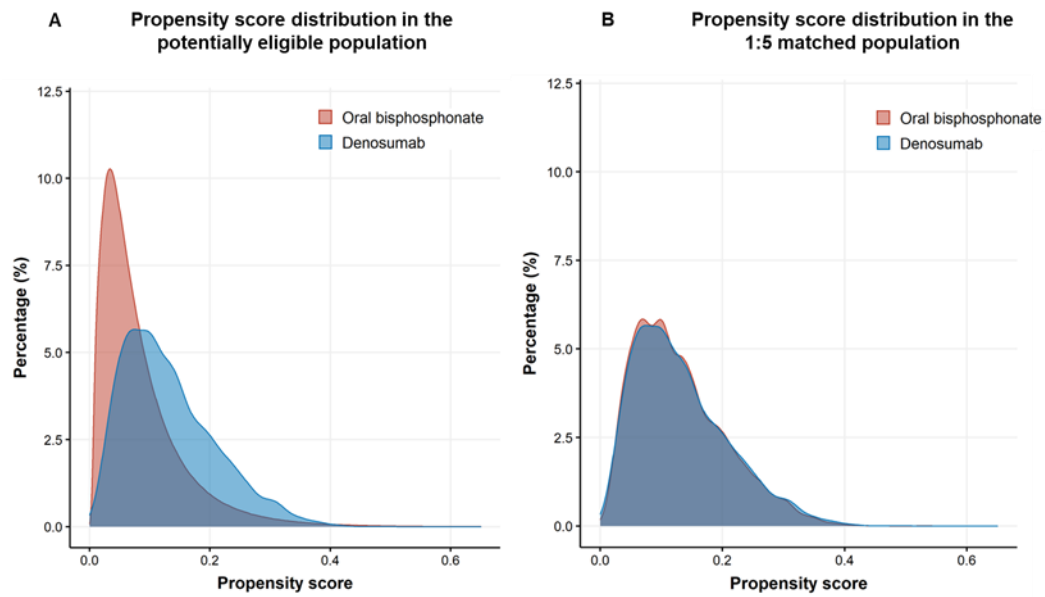

**Supplemental Figure 5 Propensity score distribution of the study groups.**

This figure displays the propensity score distributions in the potentially eligible population (A) and the 1:5 matched population (B). The objective of the matching process was to identify appropriate comparators for all eligible denosumab users. Out of the 4350 denosumab users, 4301 (98.9%) were successfully matched with comparators, as indicated by the overlapping areas of propensity score distribution in the two groups.



## Supplemental Method Matching procedure and sensitivity analyses

We used the following matching algorithm adapted from typical prevalent new user design[7]. (1) Form the base cohort of all users of denosumab and the comparator drugs. (2) For every new user of denosumab, identify from the base cohort every subject who had at least the same duration of exposure to the comparator drugs at the index date. (3) Perform a single Cox proportional hazards regression or conditional logistic regression analysis using all the exposure sets to derive the time-conditional propensity scores, including appropriate variables. (4) Verify for each exposure set that the time-conditional propensity score of the exposed subject lies within the range of the time-conditional propensity scores of the members of the corresponding exposure set, else eliminate the exposure set. (5) Matching process: starting chronologically with the first subject using denosumab, and comparators (matched at a variable 1:5 ratio) were selected from the exposure set with the nearest propensity score within a caliper (0.2 standard deviations of the propensity score on the logarithmic scale) (without replacement within in each exposure set, but may be reused in subsequent exposure sets). Subjects selected as comparators were eligible for subsequent exposure sets. (6) Form the matched cohorts: exclude denosumab users that failed to match with any comparators.

We performed a series of post-hoc sensitivity analyses to test the robustness of the study findings. Firstly, to provide a more objective evaluation of the study endpoint, we defined type 2 diabetes using laboratory tests only, including fasting blood sugar  $\geq 7.0$  mmol/L, random glucose level  $\geq 11.1$  mmol/L, glucose tolerance test result  $\geq 11.1$  mmol/L, or HbA1c level  $\geq 6.5\%$ [4]. Secondly, to account for potential glucose benefits and carry-over effects of bisphosphonates, we performed a stratified analysis by prior bisphosphonate exposure and restricted the analysis only to those treated with bisphosphonate less than 12 months. Thirdly, to improve the comparability between the study groups, we repeated the primary analysis excluding those with preexisting peptic ulcer or renal diseases. Fourthly, to examine the long-term effect, we extended the follow-up to 10 years. Fifthly, to account for potential medication adherence bias, we restricted the study populations to those with a medication possession ratio (MPR)  $\geq 0.8$ , calculated by cumulative defined daily doses (DDD) divided by the treatment duration[9]. Sixthly, to examine the potential impact of different definitions of drug discontinuation, we repeated the analysis using an alternative definition of a gap over 360 days between successive prescriptions. Seventhly, to account for potential indication bias, we repeated the analysis using monotherapy of alendronate as the comparator. Eighthly, instead of the as-treated approach, we performed an analysis using an observational analog intention-to-treat approach, allowing patients to switch between treatment groups during the follow-up. Ninthly, to examine the potential impact of incomplete data, we repeated the primary analysis using multiple imputations for variables with missing values (i.e., BMI 6%, alcohol consumption status 9%, smoking status 2%, and socioeconomic deprivation index 13.6%). We imputed 5 data sets, calculated the effect estimates for each imputed dataset, and averaged estimates and their CIs obtained from each imputed data set using Rubin's rules[10,11]. Tenthly, to examine the effect of denosumab in those treated with bisphosphonates, we performed an analysis with a pure switcher design. Eleventhly, to examine the possible carry-over effect of bisphosphonates, we further examined the difference in incidence rate between the two treatment groups at 1 to 5 years follow-up. Twelfthly, we performed an additional sensitivity analysis using more proxies of general health by including osteoarthritis, rheumatoid arthritis, gout, liver diseases,

asthma, pneumonia, history of major surgeries, history of injuries, and sleep disorders, all measured at index date. Lastly, to further account for potentially unbalanced censoring between groups, we used inverse probability weighting in sensitivity analysis 5. For inverse probability weighting, we used the same sets of covariates listed in Supplemental Figure 3; baseline covariates were measured at the index date, while time-varying covariates were updated monthly; age, sex, smoking status, alcohol drinking, BMI, and Townsend score were treated as fixed covariates and were not updated monthly.

Analyses were performed using SAS version 9.4 (SAS Institute, Cary, NC) and R-4.0.0 (R Foundation for Statistical Computing, Vienna, Austria). In SAS, we used PROC SQL and DATA steps to prepare the data. For the matching process, we used the R-package “dplyr (1.0.7)” and for fitting the propensity score model and proportional hazard regression, we used the R-package “survival (3.2-13)”. We used a robust variance estimator for log-hazard ratio when using matching with replacement[12].

**Supplemental Table 1 Specification and emulation of a target trial comparing switching to denosumab or continuing an oral bisphosphonate on the risk of type 2 diabetes using observational data**

| <b>Protocol component</b> | <b>Target pragmatic trial specification (a hypothetical RCT that is ideal for answering this question)</b>                                                                                                                                                                                                                                                                                                                                                                                   | <b>Target trial emulation (using observational data to best approximate the RCT comparison)</b>                                                                                                                                                                            |
|---------------------------|----------------------------------------------------------------------------------------------------------------------------------------------------------------------------------------------------------------------------------------------------------------------------------------------------------------------------------------------------------------------------------------------------------------------------------------------------------------------------------------------|----------------------------------------------------------------------------------------------------------------------------------------------------------------------------------------------------------------------------------------------------------------------------|
| Eligibility criteria      | Age $\geq 45$ , between 2011 and 2021;<br>Patients using oral bisphosphonates or not yet receiving any anti-osteoporosis treatment;<br>At least 1 year of up-to-standard data in a THIN primary care practice;                                                                                                                                                                                                                                                                               | Same as the target trial;                                                                                                                                                                                                                                                  |
| Treatment strategies      | (1) Denosumab treatment: initiating or switching to denosumab;<br>(2) Oral bisphosphonate treatment: initiating or continuing with an oral bisphosphonate;<br>In the above strategies, patients are not allowed to switch to any other anti-osteoporosis drug (i.e., intravenous bisphosphonate, estrogens, selective estrogen receptor modulators, teriparatide, or a combination of these medications);<br>patients are also not allowed to discontinue the initially assigned medication; | Same as for the target trial;                                                                                                                                                                                                                                              |
| Treatment assignment      | Eligible individuals are randomly assigned to one of the two “treatment strategies” stratified by duration of oral bisphosphonate (months) and are aware of the strategy to which they have been assigned;                                                                                                                                                                                                                                                                                   | We classify patients according to the strategy that they received at time zero and emulate randomization by propensity score matching; time zero is defined as the switch date or date of incident use for denosumab users and their matched oral bisphosphonate controls. |
| Outcomes                  | Incident type 2 diabetes;                                                                                                                                                                                                                                                                                                                                                                                                                                                                    | Same as for the target trial;                                                                                                                                                                                                                                              |
| Follow-up                 | Starts at the time of assignment to a strategy and ends at the earliest of diagnosis of type 2 diabetes, death, 5 years after time zero or administrative end of follow-up;                                                                                                                                                                                                                                                                                                                  | Starts at the switch date or date of incident use for denosumab users and their matched oral bisphosphonate controls;                                                                                                                                                      |
| Casual contrasts          | Per-protocol effect;                                                                                                                                                                                                                                                                                                                                                                                                                                                                         | Observational analog of the per-protocol effect;                                                                                                                                                                                                                           |
| Statistical analysis      | Intention-to-treat analysis;<br>Per-protocol analysis;                                                                                                                                                                                                                                                                                                                                                                                                                                       | Observational analog of the per-protocol analysis;                                                                                                                                                                                                                         |

**Supplemental Table 2 Baseline characteristics of the study population before matching**

| Characteristics                                       | Oral bisphosphonates (n=207481) | Denosumab (n=4350) | Standardized difference |
|-------------------------------------------------------|---------------------------------|--------------------|-------------------------|
| <b>Period of cohort entry, N (%)</b>                  |                                 |                    |                         |
| 2005 and before                                       | 24162 (11.6)                    | 0 (0.0)            |                         |
| 2006-2010                                             | 57655 (27.8)                    | 0 (0.0)            |                         |
| 2011-2015                                             | 81982 (39.5)                    | 2101 (48.3)        |                         |
| 2016-2021                                             | 43682 (21.1)                    | 2249 (51.7)        |                         |
| <b>Age at cohort entry, mean (SD)</b>                 | 71.7 (11.9)                     | 69.3 (10.6)        | 0.22                    |
| <b>Women, N (%)</b>                                   | 167847 (80.9)                   | 4102 (94.3)        | 0.42                    |
| <b>Residential care, N (%)</b>                        | 14259 (6.9)                     | 202 (4.6)          | 0.10                    |
| <b>Townsend deprivation index score, mean (SD)</b>    | 2.3 (1.6)                       | 2.2 (1.5)          | 0.05                    |
| <b>Body mass index category, N (%)</b>                |                                 |                    | 0.32                    |
| Normal                                                | 72450 (34.9)                    | 1784 (41.0)        |                         |
| Obese                                                 | 31276 (15.1)                    | 453 (10.4)         |                         |
| Overweight                                            | 59546 (28.7)                    | 1116 (25.7)        |                         |
| Underweight                                           | 21421 (10.3)                    | 750 (17.2)         |                         |
| Unknown                                               | 22788 (11.0)                    | 247 (5.7)          |                         |
| <b>Smoking status, N (%)</b>                          |                                 |                    | 0.16                    |
| Current                                               | 25688 (12.4)                    | 421 (9.7)          |                         |
| Former                                                | 59985 (28.9)                    | 1180 (27.1)        |                         |
| Never                                                 | 113977 (54.9)                   | 2663 (61.2)        |                         |
| Unknown                                               | 7831 (3.8)                      | 86 (2.0)           |                         |
| <b>Alcohol consumption status, N (%)</b>              |                                 |                    | 0.18                    |
| Current                                               | 125932 (60.7)                   | 2575 (59.2)        |                         |
| Former                                                | 6553 (3.2)                      | 162 (3.7)          |                         |
| Never                                                 | 47829 (23.1)                    | 1241 (28.5)        |                         |
| Unknown                                               | 27167 (13.1)                    | 372 (8.6)          |                         |
| <b>History of major osteoporotic fracture*, N (%)</b> | 62323 (30.0)                    | 2210 (50.8)        | 0.43                    |
| <b>Comorbidity before cohort entry, N (%)</b>         |                                 |                    |                         |
| Hypertension                                          | 95797 (46.2)                    | 2172 (49.9)        | 0.08                    |
| Hypercholesterolemia                                  | 29864 (14.4)                    | 679 (15.6)         | 0.03                    |
| Chronic obstructive pulmonary disease                 | 39105 (18.8)                    | 894 (20.6)         | 0.04                    |
| Dementia                                              | 10309 (5.0)                     | 221 (5.1)          | 0.005                   |
| Cerebrovascular disease                               | 15770 (7.6)                     | 371 (8.5)          | 0.03                    |
| Congestive heart disease                              | 7770 (3.7)                      | 219 (5.0)          | 0.06                    |
| Myocardial infarction                                 | 9399 (4.5)                      | 185 (4.3)          | 0.01                    |
| Chronic heart failure                                 | 8741 (4.2)                      | 248 (5.7)          | 0.07                    |
| Peripheral vascular disease                           | 7144 (3.4)                      | 153 (3.5)          | 0.004                   |

|                                                              |               |             |       |
|--------------------------------------------------------------|---------------|-------------|-------|
| Other circulation diseases                                   | 68059 (32.8)  | 1801 (41.4) | 0.18  |
| Venous thromboembolism                                       | 10734 (5.2)   | 299 (6.9)   | 0.07  |
| Anxiety                                                      | 31134 (15.0)  | 803 (18.5)  | 0.09  |
| Depression                                                   | 29118 (14.0)  | 701 (16.1)  | 0.06  |
| Peptic ulcer disease                                         | 8382 (4.0)    | 274 (6.3)   | 0.10  |
| Renal disease                                                | 33651 (16.2)  | 949 (21.8)  | 0.14  |
| Cancer                                                       | 32011 (15.4)  | 705 (16.2)  | 0.02  |
| <b>Drugs used in 2 years before cohort entry, N (%)</b>      |               |             |       |
| Nonsteroidal anti-inflammatory drug                          | 98322 (47.4)  | 2393 (55.0) | 0.15  |
| Antihypertensive                                             | 110552 (53.3) | 2526 (58.1) | 0.10  |
| Statin                                                       | 67397 (32.5)  | 1430 (32.9) | 0.008 |
| Aspirin                                                      | 47275 (22.8)  | 803 (18.5)  | 0.11  |
| Oral anticoagulant                                           | 13905 (6.7)   | 336 (7.7)   | 0.04  |
| Glucocorticoid                                               | 66052 (31.8)  | 1198 (27.5) | 0.09  |
| Benzodiazepine                                               | 28764 (13.9)  | 716 (16.5)  | 0.07  |
| Proton pump inhibitor                                        | 88789 (42.8)  | 2358 (54.2) | 0.23  |
| SSRI <sup>†</sup>                                            | 3789 (1.8)    | 100 (2.3)   | 0.03  |
| <b>Healthcare utilization in 2 years before cohort entry</b> |               |             |       |
| Number of hospital admissions, mean (SD)                     | 1.59 (2.94)   | 2.16 (3.56) | 0.18  |
| Number of doctor visits, N (%)                               |               |             | 0.53  |
| 0-1                                                          | 66397 (32.0)  | 642 (14.8)  |       |
| 2-4                                                          | 56333 (27.2)  | 918 (21.1)  |       |
| 5-8                                                          | 40742 (19.6)  | 1053 (24.2) |       |
| 9 and more                                                   | 44009 (21.2)  | 1737 (39.9) |       |

**Notes:** \* Include fractures at the hip, vertebral, wrist, humerus, pelvis, and rib. <sup>†</sup>SSRI, selective serotonin reuptake inhibitor.

**Supplemental Table 3 Baseline characteristics comparison between the incident and prevalent new users of denosumab**

| <b>Characteristics</b>                                    | <b>Incident<br/>new users<br/>(n=961)</b> | <b>Prevalent<br/>new users<br/>(n=3340)</b> | <b>Standardized<br/>difference</b> |
|-----------------------------------------------------------|-------------------------------------------|---------------------------------------------|------------------------------------|
| <b>Period of cohort entry, N (%)</b>                      |                                           |                                             | 0.17                               |
| 2011-2013                                                 | 168 (17.5)                                | 638 (19.1)                                  |                                    |
| 2014-2016                                                 | 409 (42.6)                                | 1411 (42.2)                                 |                                    |
| 2017-2019                                                 | 253 (26.3)                                | 1002 (30.0)                                 |                                    |
| 2020-2021                                                 | 131 (13.6)                                | 289 (8.7)                                   |                                    |
| <b>Age at cohort entry, mean (SD)</b>                     | 77.2 (10.9)                               | 75.3 (9.5)                                  | 0.19                               |
| <b>Women, N (%)</b>                                       | 864 (89.9)                                | 3191 (95.5)                                 | 0.22                               |
| <b>Residential care, N (%)</b>                            | 108 (11.2)                                | 92 (2.8)                                    | 0.34                               |
| <b>Townsend deprivation index score, mean (SD)</b>        | 2.2 (1.5)                                 | 2.2 (1.5)                                   | 0.04                               |
| <b>Body mass index category, N (%)</b>                    |                                           |                                             | 0.46                               |
| Normal                                                    | 344 (35.8)                                | 1422 (42.6)                                 |                                    |
| Obese                                                     | 102 (10.6)                                | 348 (10.4)                                  |                                    |
| Overweight                                                | 207 (21.5)                                | 902 (27.0)                                  |                                    |
| Underweight                                               | 157 (16.3)                                | 572 (17.1)                                  |                                    |
| Unknown                                                   | 151 (15.7)                                | 96 (2.9)                                    |                                    |
| <b>Smoking status, N (%)</b>                              |                                           |                                             | 0.40                               |
| Current                                                   | 97 (10.1)                                 | 323 (9.7)                                   |                                    |
| Former                                                    | 255 (26.5)                                | 914 (27.4)                                  |                                    |
| Never                                                     | 532 (55.4)                                | 2094 (62.7)                                 |                                    |
| Unknown                                                   | 77 (8.0)                                  | 9 (0.3)                                     |                                    |
| <b>Alcohol drinking status, N (%)</b>                     |                                           |                                             | 0.44                               |
| Current                                                   | 495 (51.5)                                | 2056 (61.6)                                 |                                    |
| Former                                                    | 30 (3.1)                                  | 131 (3.9)                                   |                                    |
| Never                                                     | 247 (25.7)                                | 972 (29.1)                                  |                                    |
| Unknown                                                   | 189 (19.7)                                | 181 (5.4)                                   |                                    |
| <b>Bisphosphonate treatment length (years, mean (SD))</b> | 0.00 (0.00)                               | 7.21 (4.65)                                 | -                                  |
| <b>History of major osteoporotic fracture*, N (%)</b>     | 479 (49.8)                                | 1690 (50.6)                                 | 0.02                               |
| <b>Comorbidity before cohort entry, N (%)</b>             |                                           |                                             |                                    |
| Hypertension                                              | 497 (51.7)                                | 1650 (49.4)                                 | 0.05                               |
| Hypercholesterolemia                                      | 137 (14.3)                                | 533 (16.0)                                  | 0.05                               |
| Chronic obstructive pulmonary disease                     | 172 (17.9)                                | 715 (21.4)                                  | 0.09                               |
| Dementia                                                  | 99 (10.3)                                 | 120 (3.6)                                   | 0.27                               |
| Cerebrovascular disease                                   | 95 (9.9)                                  | 274 (8.2)                                   | 0.06                               |
| Congestive heart disease                                  | 70 (7.3)                                  | 147 (4.4)                                   | 0.12                               |

|                                                              |             |             |      |
|--------------------------------------------------------------|-------------|-------------|------|
| Myocardial infarction                                        | 52 (5.4)    | 130 (3.9)   | 0.07 |
| Chronic heart failure                                        | 79 (8.2)    | 167 (5.0)   | 0.13 |
| Peripheral vascular disease                                  | 45 (4.7)    | 107 (3.2)   | 0.08 |
| Other circulation diseases                                   | 341 (35.5)  | 1439 (43.1) | 0.16 |
| Venous thromboembolism                                       | 76 (7.9)    | 221 (6.6)   | 0.05 |
| Anxiety                                                      | 157 (16.3)  | 638 (19.1)  | 0.07 |
| Depression                                                   | 145 (15.1)  | 549 (16.4)  | 0.04 |
| Peptic ulcer disease                                         | 76 (7.9)    | 192 (5.7)   | 0.09 |
| Renal disease                                                | 247 (25.7)  | 689 (20.6)  | 0.12 |
| Cancer                                                       | 159 (16.5)  | 535 (16.0)  | 0.01 |
| <b>Drugs in 2 years before cohort entry, N (%)</b>           |             |             |      |
| Nonsteroidal anti-inflammatory drug                          | 504 (52.4)  | 1857 (55.6) | 0.06 |
| Antihypertensive                                             | 577 (60.0)  | 1920 (57.5) | 0.05 |
| Statin                                                       | 302 (31.4)  | 1115 (33.4) | 0.04 |
| Aspirin                                                      | 170 (17.7)  | 627 (18.8)  | 0.03 |
| Oral anticoagulant                                           | 91 (9.5)    | 242 (7.2)   | 0.08 |
| Glucocorticoid                                               | 186 (19.4)  | 1002 (30.0) | 0.25 |
| Benzodiazepine                                               | 148 (15.4)  | 556 (16.6)  | 0.03 |
| Proton pump inhibitor                                        | 497 (51.7)  | 1825 (54.6) | 0.06 |
| SSRI <sup>†</sup>                                            | 21 (2.2)    | 79 (2.4)    | 0.01 |
| <b>Healthcare utilization in 2 years before cohort entry</b> |             |             |      |
| Number of hospital admissions, mean (SD)                     | 2.09 (3.29) | 2.15 (3.57) | 0.02 |
| Number of doctor visits, N (%)                               |             |             | 0.35 |
| 0-1                                                          | 236 (24.6)  | 403 (12.1)  |      |
| 2-4                                                          | 210 (21.9)  | 704 (21.1)  |      |
| 5-8                                                          | 205 (21.3)  | 837 (25.1)  |      |
| 9 and more                                                   | 310 (32.3)  | 1396 (41.8) |      |

**Notes:** \*Major osteoporotic fractures include fractures at the hip, vertebral, wrist, humerus, pelvis, and rib. †SSRI, selective serotonin reuptake inhibitor.

**Supplemental Table 4 Average treatment effect (ATE) and average treatment effect in those treated (ATT) in a subpopulation of incident new users**

| <b>Exposure</b>                             | <b>Number of patients, n</b> | <b>Number of events, n</b> | <b>Person-years</b> | <b>Incident rate* (95% CI)</b> | <b>HR (95% CI)</b>  |
|---------------------------------------------|------------------------------|----------------------------|---------------------|--------------------------------|---------------------|
| <b>ATT: propensity score matching†</b>      |                              |                            |                     |                                |                     |
| Oral bisphosphonate                         | 4,802                        | 89                         | 10,345              | 8.6 (6.9 to 10.6)              | Reference           |
| Denosumab                                   | 961                          | 6                          | 2,036               | 3.0 (1.1 to 6.4)               | 0.35 (0.15 to 0.79) |
| <b>ATE: inverse probability weighting ‡</b> |                              |                            |                     |                                |                     |
| Oral bisphosphonate                         | 125,537                      | 3,164                      | 290,122             | 10.9 (10.5 to 11.3)            | Reference           |
| Denosumab                                   | 958                          | 8                          | 2,085               | 3.8 (1.7 to 7.6)               | 0.34 (0.11 to 1.01) |

**Notes:** \* Per 1,000 person-years; † the same results of sensitivity analysis 1 from **Table 4**; ‡ stabilized inverse probability weights were used[13].



**Supplemental Table 5 Sensitivity analysis with an alternative definition of type 2 diabetes by laboratory tests only**

| <b>Exposure</b>                                                                | <b>Number of patients, n*</b> | <b>Number of events, n</b> | <b>Person-years</b> | <b>Incident rate†<br/>(95% CI)</b> | <b>HR<br/>(95% CI)</b> |
|--------------------------------------------------------------------------------|-------------------------------|----------------------------|---------------------|------------------------------------|------------------------|
| An alternative definition of type 2 diabetes with blood glucose level or HbA1c |                               |                            |                     |                                    |                        |
| Oral bisphosphonate                                                            | 21,038                        | 235                        | 41,939              | 5.6 (4.9 to 6.4)                   | Reference              |
| Denosumab                                                                      | 4,301                         | 40                         | 10,668              | 3.8 (2.7 to 5.1)                   | 0.66 (0.48 to 0.93)    |

**Notes:** \* Recipients of denosumab users were matched up to 5 oral bisphosphonate recipients with propensity scores. † Per 1,000 person-years. Definition of type 2 diabetes: fasting blood sugar  $\geq 7.0$  mmol/L, random glucose level  $\geq 11.1$  mmol/L, glucose tolerance test result  $\geq 11.1$  mmol/L, or glycated hemoglobin A1c level  $\geq 6.5\%$ . CI, confidence interval; HR, hazard ratio.

**Supplemental Table 6 Subgroup analyses stratified by prior bisphosphonate exposure**

| <b>Exposure</b>                                                                                       | <b>Number of patients, n</b> | <b>Number of events, n</b> | <b>Person-years</b> | <b>Incident rate* (95% CI)</b> | <b>HR (95% CI)</b>  | <b>P for interaction</b> |
|-------------------------------------------------------------------------------------------------------|------------------------------|----------------------------|---------------------|--------------------------------|---------------------|--------------------------|
| <b>Subgroup analysis 1:</b> stratified by prior bisphosphonate length                                 |                              |                            |                     |                                |                     |                          |
| Prior bisphosphonate length of less than 36 months                                                    |                              |                            |                     |                                |                     |                          |
| Oral bisphosphonate                                                                                   | 8,799                        | 161                        | 18,501              | 8.7 (7.4 to 10.2)              | Reference           | 0.85                     |
| Denosumab                                                                                             | 1,759                        | 23                         | 4,053               | 5.7 (3.6 to 8.5)               | 0.66 (0.43 to 1.02) |                          |
| Prior bisphosphonate length of over 36 months                                                         |                              |                            |                     |                                |                     |                          |
| Oral bisphosphonate                                                                                   | 12,239                       | 186                        | 23,400              | 8.0 (6.9 to 9.2)               | Reference           | NA                       |
| Denosumab                                                                                             | 2,542                        | 37                         | 6,564               | 5.6 (4.0 to 7.8)               | 0.69 (0.49 to 0.96) |                          |
| <b>Subgroup analysis 2:</b> stratified by prior cumulative defined daily dose (DDD) of bisphosphonate |                              |                            |                     |                                |                     |                          |
| Prior cumulative DDD of bisphosphonate of less than 36 months                                         |                              |                            |                     |                                |                     |                          |
| Oral bisphosphonate                                                                                   | 10,156                       | 193                        | 20,887              | 9.2 (8.0 to 10.6)              | Reference           | 0.99                     |
| Denosumab                                                                                             | 2,692                        | 39                         | 6,402               | 6.1 (4.3 to 8.3)               | 0.66 (0.47 to 0.93) |                          |
| Prior cumulative DDD of bisphosphonate of over 36 months                                              |                              |                            |                     |                                |                     |                          |
| Oral bisphosphonate                                                                                   | 10,882                       | 154                        | 21,014              | 7.3 (6.2 to 8.6)               | Reference           | NA                       |
| Denosumab                                                                                             | 1,609                        | 21                         | 4,215               | 5.0 (3.1 to 7.6)               | 0.65 (0.41 to 1.01) |                          |

**Notes:** \* Per 1,000 person-years, † additionally adjusted for age, sex, and propensity score. P for interaction was reported for the interaction term in the additionally adjusted models. CI, confidence interval; HR, hazard ratio; NA, not applicable.

**Supplemental Table 7 Sensitivity analysis by excluding patients with preexisting peptic ulcer diseases or renal diseases**

| <b>Exposure</b>                                                 | <b>Number of patients, n*</b> | <b>Number of events, n</b> | <b>Person-years</b> | <b>Incident rate†<br/>(95% CI)</b> | <b>HR<br/>(95% CI)</b> |
|-----------------------------------------------------------------|-------------------------------|----------------------------|---------------------|------------------------------------|------------------------|
| Excluding patients with peptic ulcer diseases or renal diseases |                               |                            |                     |                                    |                        |
| Oral bisphosphonate                                             | 15,182                        | 227                        | 31,087              | 7.3 (6.4 to 8.3)                   | Reference              |
| Denosumab                                                       | 3,048                         | 42                         | 7,648               | 5.5 (4.0 to 7.4)                   | 0.75 (0.54 to 1.03)    |
| Excluding patients with peptic ulcer disease                    |                               |                            |                     |                                    |                        |
| Oral bisphosphonate                                             | 19,218                        | 313                        | 38,320              | 8.2 (7.3 to 9.1)                   | Reference              |
| Denosumab                                                       | 3,869                         | 50                         | 9,561               | 5.2 (3.9 to 6.9)                   | 0.63 (0.47 to 0.86)    |
| Excluding patients with renal diseases                          |                               |                            |                     |                                    |                        |
| Oral bisphosphonate                                             | 16,544                        | 247                        | 33,843              | 7.3 (6.4 to 8.3)                   | Reference              |
| Denosumab                                                       | 3,365                         | 48                         | 8,438               | 5.7 (4.2 to 7.5)                   | 0.77 (0.57 to 1.05)    |

**Notes:** \* Recipients of denosumab users were matched up to 5 oral bisphosphonate recipients with propensity scores. † Per 1,000 person-years. CI, confidence interval; HR, hazard ratio.

**Supplemental Table 8 Sensitivity analysis restricting the patient only to those switched within 12 months of oral bisphosphonates**

| <b>Exposure</b>                                                                                                                      | <b>Number of patients, n*</b> | <b>Number of events, n</b> | <b>Person-years</b> | <b>Incident rate†<br/>(95% CI)</b> | <b>HR<br/>(95% CI)</b> |
|--------------------------------------------------------------------------------------------------------------------------------------|-------------------------------|----------------------------|---------------------|------------------------------------|------------------------|
| The primary outcome: defined by the type 2 diabetes diagnostic codes                                                                 |                               |                            |                     |                                    |                        |
| Oral bisphosphonate                                                                                                                  | 6,060                         | 117                        | 12,901              | 9.1 (7.5 to 10.9)                  | Reference              |
| Denosumab                                                                                                                            | 1,213                         | 10                         | 2,641               | 3.8 (1.8 to 7.0)                   | 0.42 (0.22 to 0.81)    |
| The secondary outcome: an alternative definition of type 2 diabetes with diagnostic codes, antidiabetic medication, and lab results. |                               |                            |                     |                                    |                        |
| Oral bisphosphonate                                                                                                                  | 6,060                         | 158                        | 12,858              | 12.3 (10.4 to 14.4)                | Reference              |
| Denosumab                                                                                                                            | 1,213                         | 17                         | 2,640               | 6.4 (3.8 to 10.3)                  | 0.53 (0.32 to 0.88)    |

**Notes:** \* Recipients of denosumab users were matched up to 5 oral bisphosphonate recipients with propensity scores. † Per 1,000 person-years. CI, confidence interval; HR, hazard ratio

**Supplemental Table 9 Sensitivity analysis by extending the follow-up length to 10 years**

| <b>Exposure</b>                                                                                                                      | <b>Number of patients, n*</b> | <b>Number of events, n</b> | <b>Person-years</b> | <b>Incident rate† (95% CI)</b> | <b>HR (95% CI)</b>  |
|--------------------------------------------------------------------------------------------------------------------------------------|-------------------------------|----------------------------|---------------------|--------------------------------|---------------------|
| The primary outcome: defined by the type 2 diabetes diagnostic codes                                                                 |                               |                            |                     |                                |                     |
| Oral bisphosphonate                                                                                                                  | 21,038                        | 395                        | 44,340              | 8.9 (8.1 to 9.8)               | Reference           |
| Denosumab                                                                                                                            | 4,301                         | 65                         | 11,353              | 5.7 (4.4 to 7.3)               | 0.63 (0.49 to 0.82) |
| The secondary outcome: an alternative definition of type 2 diabetes with diagnostic codes, antidiabetic medication, and lab results. |                               |                            |                     |                                |                     |
| Oral bisphosphonate                                                                                                                  | 21,038                        | 548                        | 44,258              | 12.1 (11.4 to 13.5)            | Reference           |
| Denosumab                                                                                                                            | 4,301                         | 97                         | 11,331              | 8.6 (7.0 to 10.4)              | 0.68 (0.55 to 0.84) |

**Notes:** \* Recipients of denosumab users were matched up to 5 oral bisphosphonate recipients with propensity scores. † Per 1,000 person-years. CI, confidence interval; HR, hazard ratio.

**Supplemental Table 10 Sensitivity analysis only includes those with a medication possession ratio (MPR)  $\geq 0.8$**

| <b>Exposure</b>                                                      | <b>Number of patients, n*</b> | <b>Number of events, n</b> | <b>Person-years</b> | <b>Incident rate<sup>†</sup><br/>(95% CI)</b> | <b>HR<br/>(95% CI)</b> |
|----------------------------------------------------------------------|-------------------------------|----------------------------|---------------------|-----------------------------------------------|------------------------|
| The primary outcome: defined by the type 2 diabetes diagnostic codes |                               |                            |                     |                                               |                        |
| Oral bisphosphonate                                                  | 19,501                        | 306                        | 37,919              | 8.1 (7.2 to 9.0)                              | Reference              |
| Denosumab                                                            | 4,051                         | 54                         | 9,890               | 5.5 (4.1 to 7.1)                              | 0.67 (0.51 to 0.90)    |

**Notes:** \* Recipients of denosumab users were matched up to 5 oral bisphosphonate recipients with propensity scores. <sup>†</sup> Per 1,000 person-years. The MPR was calculated by cumulative defined daily doses (DDD) for each drug divided by the treatment duration. Analysis was performed only on subjects with high MPR ( $\geq 0.8$ ). CI, confidence interval; HR, hazard ratio.

**Supplemental Table 11 Sensitivity analysis using drug discontinuation defined by a gap over 360 days between successive prescriptions**

| <b>Exposure</b>                                                      | <b>Number of patients, n*</b> | <b>Number of events, n</b> | <b>Person-years</b> | <b>Incident rate†<br/>(95% CI)</b> | <b>HR<br/>(95% CI)</b> |
|----------------------------------------------------------------------|-------------------------------|----------------------------|---------------------|------------------------------------|------------------------|
| The primary outcome: defined by the type 2 diabetes diagnostic codes |                               |                            |                     |                                    |                        |
| Oral bisphosphonate                                                  | 21,038                        | 347                        | 51,104              | 6.8 (6.1 to 7.5)                   | Reference              |
| Denosumab                                                            | 4,301                         | 60                         | 12,422              | 4.8 (3.7 to 6.2)                   | 0.71 (0.54 to 0.93)    |

**Notes:** \* Recipients of denosumab users were matched up to 5 oral bisphosphonate recipients with propensity scores. † Per 1,000 person-years. CI, confidence interval; HR, hazard ratio.

**Supplemental Table 12 Sensitivity analysis using alendronate as the comparator (switching to denosumab vs. continuing alendronate)**

| <b>Exposure</b>                                                                                                                      | <b>Number of patients, n*</b> | <b>Number of events, n</b> | <b>Person-years</b> | <b>Incident rate†<br/>(95% CI)</b> | <b>HR<br/>(95% CI)</b> |
|--------------------------------------------------------------------------------------------------------------------------------------|-------------------------------|----------------------------|---------------------|------------------------------------|------------------------|
| The primary outcome: defined by the type 2 diabetes diagnostic codes                                                                 |                               |                            |                     |                                    |                        |
| Oral bisphosphonate                                                                                                                  | 13,819                        | 194                        | 27,142              | 7.2 (6.2 to 8.2)                   | Reference              |
| Denosumab                                                                                                                            | 2,825                         | 31                         | 6,654               | 4.7 (3.2 to 6.6)                   | 0.65 (0.45 to 0.96)    |
| The secondary outcome: an alternative definition of type 2 diabetes with diagnostic codes, antidiabetic medication, and lab results. |                               |                            |                     |                                    |                        |
| Oral bisphosphonate                                                                                                                  | 13,819                        | 269                        | 27,072              | 9.9 (8.8 to 11.2)                  | Reference              |
| Denosumab                                                                                                                            | 2,825                         | 43                         | 6,650               | 6.5 (4.7 to 8.7)                   | 0.65 (0.47 to 0.90)    |

**Notes:** \* Recipients of denosumab users were matched up to 5 oral bisphosphonate recipients with propensity scores. † Per 1,000 person-years. CI, confidence interval; HR, hazard ratio.



**Supplemental Table 13 Sensitivity analysis using an observational analogous intention to treat approach**

| <b>Exposure</b>                                                      | <b>Number of patients, n*</b> | <b>Number of events, n</b> | <b>Person-years</b> | <b>Incident rate†<br/>(95% CI)</b> | <b>HR<br/>(95% CI)</b> |
|----------------------------------------------------------------------|-------------------------------|----------------------------|---------------------|------------------------------------|------------------------|
| The primary outcome: defined by the type 2 diabetes diagnostic codes |                               |                            |                     |                                    |                        |
| Oral bisphosphonate                                                  | 21,038                        | 347                        | 80,982              | 4.3 (3.9 to 4.8)                   | Reference              |
| Denosumab                                                            | 4,301                         | 60                         | 16,369              | 3.7 (2.8 to 4.7)                   | 0.85 (0.65 to 1.12)    |

**Notes:** \* Recipients of denosumab users were matched up to 5 oral bisphosphonate recipients with propensity scores. † Per 1,000 person-years. Patients were followed until the occurrence of the study outcome, death, transfer out of primary care clinic, 5 years follow-up, or end of the study period (December 31, 2021), whichever occurred first. Patients were allowed to switch between treatment groups; in continuous bisphosphonate users, 896 patients switched to denosumab, while in those who switched to denosumab from oral bisphosphonate, 103 patients switched back to oral bisphosphonates during 5 years follow-up. CI, confidence interval; HR, hazard ratio.

**Supplemental Table 14 Sensitivity analysis with multiple imputations for incomplete data**

| <b>Exposure</b>                                                                                                                      | <b>Number of patients, n*</b> | <b>Number of events, n</b> | <b>Person-years</b> | <b>Incident rate†<br/>(95% CI)</b> | <b>HR<br/>(95% CI)</b> |
|--------------------------------------------------------------------------------------------------------------------------------------|-------------------------------|----------------------------|---------------------|------------------------------------|------------------------|
| The primary outcome: defined by the type 2 diabetes diagnostic codes                                                                 |                               |                            |                     |                                    |                        |
| Oral bisphosphonate                                                                                                                  | 21,085                        | 337                        | 42,184              | 8.0 (7.0 to 8.9)                   | Reference              |
| Denosumab                                                                                                                            | 4,300                         | 60                         | 10,614              | 5.7 (4.0 to 7.3)                   | 0.70 (0.53 to 0.90)    |
| The secondary outcome: an alternative definition of type 2 diabetes with diagnostic codes, antidiabetic medication, and lab results. |                               |                            |                     |                                    |                        |
| Oral bisphosphonate                                                                                                                  | 21,085                        | 451                        | 42,110              | 10.7 (9.5 to 11.9)                 | Reference              |
| Denosumab                                                                                                                            | 4,300                         | 90                         | 10,596              | 8.5 (6.5 to 10.4)                  | 0.79 (0.62 to 0.97)    |

**Notes:** \* Recipients of denosumab users were matched up to 5 oral bisphosphonate recipients with propensity scores. † Per 1,000 person-years. We repeated the primary analysis using multiple imputations for variables with missing values (i.e., body mass index 6%, alcohol consumption status 9%, smoking status 2%, and socioeconomic deprivation index 13.6%). We imputed 5 data sets, calculated the effect estimates for each imputed dataset, and averaged estimates and their confidence intervals obtained from each imputed data set using Rubin’s rules. CI, confidence interval; HR, hazard ratio.

**Supplemental Table 15 Sensitivity analysis with more proxies of general health status**

| <b>Exposure</b>                                                                                                                      | <b>Number of patients, n*</b> | <b>Number of events, n</b> | <b>Person-years</b> | <b>Incident rate†<br/>(95% CI)</b> | <b>HR<br/>(95% CI)</b> |
|--------------------------------------------------------------------------------------------------------------------------------------|-------------------------------|----------------------------|---------------------|------------------------------------|------------------------|
| The primary outcome: defined by the type 2 diabetes diagnostic codes                                                                 |                               |                            |                     |                                    |                        |
| Oral bisphosphonate                                                                                                                  | 21,004                        | 340                        | 41,757              | 8.1 (7.3 to 9.1)                   | Reference              |
| Denosumab                                                                                                                            | 4,293                         | 60                         | 10,598              | 5.7 (4.3 to 7.3)                   | 0.69 (0.53 to 0.91)    |
| The secondary outcome: an alternative definition of type 2 diabetes with diagnostic codes, antidiabetic medication, and lab results. |                               |                            |                     |                                    |                        |
| Oral bisphosphonate                                                                                                                  | 21,0004                       | 463                        | 41,685              | 11.1 (10.1 to 12.2)                | Reference              |
| Denosumab                                                                                                                            | 4,293                         | 90                         | 10,579              | 8.5 (6.8 to 10.5)                  | 0.76 (0.61 to 0.95)    |

**Notes:** \* Recipients of denosumab users were matched up to 5 oral bisphosphonate recipients with propensity scores. † Per 1,000 person-years. We performed an additional sensitivity analysis using more proxies of general health by including osteoarthritis, rheumatoid arthritis, gout, liver diseases, asthma, pneumonia, major surgeries history, injury histories, and sleep disorders all measured at index date. CI, confidence interval; HR, hazard ratio.

**Supplemental Table 16 Sensitivity analysis of using inverse probability weighting to address potentially unbalanced censoring between groups**

| <b>Exposure</b>                                                                                                           | <b>Number of patients, n</b> | <b>Number of events, n</b> | <b>Person-years</b> | <b>Incident rate* (95% CI)</b> | <b>HR (95% CI)</b>  |
|---------------------------------------------------------------------------------------------------------------------------|------------------------------|----------------------------|---------------------|--------------------------------|---------------------|
| <b>Sensitivity analysis 5 from Table 4:</b> nearest neighbor matching within specified caliper widths without replacement |                              |                            |                     |                                |                     |
| Oral bisphosphonate                                                                                                       | 20,262                       | 340                        | 40,866              | 8.3 (7.5 to 9.3)               | Reference           |
| Denosumab                                                                                                                 | 4,210                        | 59                         | 10,428              | 5.7 (4.3 to 7.3)               | 0.68 (0.52 to 0.89) |
| <b>Additional inverse probability censoring weighting for sensitivity analysis 5 †</b>                                    |                              |                            |                     |                                |                     |
| Oral bisphosphonate                                                                                                       | 20,262                       | 341                        | 41,799              | 8.2 (7.3 to 9.1)               | Reference           |
| Denosumab                                                                                                                 | 4,210                        | 58                         | 10,490              | 5.5 (4.2 to 7.2)               | 0.68 (0.52 to 0.90) |

**Notes:** \* Per 1,000 person-years. † As we estimated the protocol effects, we additionally used inverse probability weighting to deal with potentially unbalanced censoring between groups. For inverse probability weighting, we used the same sets of covariates listed in Supplemental Figure 3; baseline covariates were measured at the index date, while time-varying covariates were updated monthly; age, sex, smoking status, alcohol drinking, BMI, and Townsend score were treated as fixed covariates and were not updated monthly. HR, hazard ratio; CI, confidence interval.

**Supplemental Table 17 Sensitivity analysis with pure switcher design, exclusively including participants treated with bisphosphonates**

| <b>Exposure</b>                                                                   | <b>Number of patients, n*</b> | <b>Number of events, n</b> | <b>Person-years</b> | <b>Incident rate†<br/>(95% CI)</b> | <b>HR<br/>(95% CI)</b> |
|-----------------------------------------------------------------------------------|-------------------------------|----------------------------|---------------------|------------------------------------|------------------------|
| A pure switcher design                                                            |                               |                            |                     |                                    |                        |
| Oral bisphosphonate                                                               | 16,236                        | 258                        | 31,555              | 8.2 (7.2 to 9.2)                   | Reference              |
| Denosumab                                                                         | 3,340                         | 54                         | 8,581               | 6.3 (4.7 to 8.2)                   | 0.76 (0.57 to 1.01)    |
| A pure switcher design in the subgroup of patients with prediabetes               |                               |                            |                     |                                    |                        |
| Oral bisphosphonate                                                               | 3,852                         | 153                        | 7,113               | 21.5 (18.2 to 25.2)                | Reference              |
| Denosumab                                                                         | 705                           | 22                         | 1,691               | 13.0 (8.2 to 19.7)                 | 0.60 (0.39 to 0.94)    |
| A pure switcher design in the subgroup of patients with body mass index over 30 ‡ |                               |                            |                     |                                    |                        |
| Oral bisphosphonate                                                               | 1,684                         | 81                         | 3,522               | 23.0 (18.3 to 28.6)                | Reference              |
| Denosumab                                                                         | 348                           | 17                         | 949                 | 17.9 (10.4 to 28.7)                | 0.78 (0.46 to 1.30)    |

**Notes:** \* Recipients of denosumab users were matched up to 5 oral bisphosphonate recipients with propensity scores. † Per 1,000 person-years. ‡ Patients with missing values for body mass index were excluded from the analysis. CI, confidence interval; HR, hazard ratio.

**Supplemental Table 18 Incidence rate of type 2 diabetes at 1 to 5 years follow-up**

| <b>Exposure</b>                            | <b>Number of patients, n*</b> | <b>Number of events, n</b> | <b>Person-years</b> | <b>Incident rate† (95% CI)</b> | <b>HR (95% CI)</b>  |
|--------------------------------------------|-------------------------------|----------------------------|---------------------|--------------------------------|---------------------|
| <b>Incidence rate at 1 year follow-up</b>  |                               |                            |                     |                                |                     |
| Oral bisphosphonate                        | 21,038                        | 131                        | 17,576              | 7.5 (6.2 to 8.8)               | Reference           |
| Denosumab                                  | 4,301                         | 20                         | 4,272               | 4.7 (2.9 to 7.2)               | 0.64 (0.40 to 1.03) |
| <b>Incidence rate at 2 years follow-up</b> |                               |                            |                     |                                |                     |
| Oral bisphosphonate                        | 21,038                        | 216                        | 28,618              | 7.6 (6.6 to 8.6)               | Reference           |
| Denosumab                                  | 4,301                         | 32                         | 7,024               | 4.6 (3.1 to 6.4)               | 0.61 (0.42 to 0.88) |
| <b>Incidence rate at 3 years follow-up</b> |                               |                            |                     |                                |                     |
| Oral bisphosphonate                        | 21,038                        | 276                        | 35,420              | 7.8 (6.9 to 8.8)               | Reference           |
| Denosumab                                  | 4,301                         | 43                         | 8,816               | 4.9 (3.5 to 6.6)               | 0.63 (0.46 to 0.86) |
| <b>Incidence rate at 4 years follow-up</b> |                               |                            |                     |                                |                     |
| Oral bisphosphonate                        | 21,038                        | 317                        | 39,539              | 8.0 (7.2 to 9.0)               | Reference           |
| Denosumab                                  | 4,301                         | 43                         | 9,944               | 5.1 (3.8 to 6.7)               | 0.64 (0.48 to 0.86) |
| <b>Incidence rate at 5 years follow-up</b> |                               |                            |                     |                                |                     |
| Oral bisphosphonate                        | 21,038                        | 347                        | 41,900              | 8.3 (7.4 to 9.2)               | Reference           |
| Denosumab                                  | 4,301                         | 60                         | 10,617              | 5.7 (4.3 to 7.3)               | 0.68 (0.52 to 0.89) |

**Notes:** \* Recipients of denosumab users were matched up to 5 oral bisphosphonate recipients with propensity scores. † Per 1,000 person-years. CI, confidence interval; HR, hazard ratio.

**Supplemental Table 19 Diagnostic codes list of type 2 diabetes**

| <b>Diagnostic code</b> | <b>Code type</b> | <b>Description</b>                                           |
|------------------------|------------------|--------------------------------------------------------------|
| C100112                | Read             | Non-insulin dependent diabetes mellitus                      |
| C103y00                | Read             | Other specified diabetes mellitus with coma                  |
| C109.00                | Read             | Non-insulin dependent diabetes mellitus                      |
| C109000                | Read             | Non-insulin-dependent diabetes mellitus with renal comps     |
| C109011                | Read             | Type II diabetes mellitus with renal complications           |
| C109012                | Read             | Type 2 diabetes mellitus with renal complications            |
| C109100                | Read             | Non-insulin-dependent diabetes mellitus with ophthalm comps  |
| C109.11                | Read             | NIDDM - Non-insulin dependent diabetes mellitus              |
| C109111                | Read             | Type II diabetes mellitus with ophthalmic complications      |
| C109112                | Read             | Type 2 diabetes mellitus with ophthalmic complications       |
| C109.12                | Read             | Type 2 diabetes mellitus                                     |
| C109.13                | Read             | Type II diabetes mellitus                                    |
| C109200                | Read             | Non-insulin-dependent diabetes mellitus with neuro comps     |
| C109211                | Read             | Type II diabetes mellitus with neurological complications    |
| C109212                | Read             | Type 2 diabetes mellitus with neurological complications     |
| C109300                | Read             | Non-insulin-dependent diabetes mellitus with multiple comps  |
| C109312                | Read             | Type 2 diabetes mellitus with multiple complications         |
| C109400                | Read             | Non-insulin dependent diabetes mellitus with ulcer           |
| C109411                | Read             | Type II diabetes mellitus with ulcer                         |
| C109412                | Read             | Type 2 diabetes mellitus with ulcer                          |
| C109500                | Read             | Non-insulin dependent diabetes mellitus with gangrene        |
| C109511                | Read             | Type II diabetes mellitus with gangrene                      |
| C109512                | Read             | Type 2 diabetes mellitus with gangrene                       |
| C109600                | Read             | Non-insulin-dependent diabetes mellitus with retinopathy     |
| C109611                | Read             | Type II diabetes mellitus with retinopathy                   |
| C109612                | Read             | Type 2 diabetes mellitus with retinopathy                    |
| C109700                | Read             | Non-insulin dependent diabetes mellitus - poor control       |
| C109711                | Read             | Type II diabetes mellitus - poor control                     |
| C109712                | Read             | Type 2 diabetes mellitus - poor control                      |
| C109900                | Read             | Non-insulin-dependent diabetes mellitus without complication |
| C109911                | Read             | Type II diabetes mellitus without complication               |
| C109912                | Read             | Type 2 diabetes mellitus without complication                |
| C109A00                | Read             | Non-insulin dependent diabetes mellitus with mononeuropathy  |
| C109A11                | Read             | Type II diabetes mellitus with mononeuropathy                |
| C109B00                | Read             | Non-insulin dependent diabetes mellitus with polyneuropathy  |
| C109B11                | Read             | Type II diabetes mellitus with polyneuropathy                |
| C109B12                | Read             | Type 2 diabetes mellitus with polyneuropathy                 |

|         |      |                                                             |
|---------|------|-------------------------------------------------------------|
| C109C00 | Read | Non-insulin dependent diabetes mellitus with nephropathy    |
| C109C11 | Read | Type II diabetes mellitus with nephropathy                  |
| C109C12 | Read | Type 2 diabetes mellitus with nephropathy                   |
| C109D00 | Read | Non-insulin dependent diabetes mellitus with hypoglyca coma |
| C109D11 | Read | Type II diabetes mellitus with hypoglycaemic coma           |
| C109D12 | Read | Type 2 diabetes mellitus with hypoglycaemic coma            |
| C109E00 | Read | Non-insulin depend diabetes mellitus with diabetic cataract |
| C109E11 | Read | Type II diabetes mellitus with diabetic cataract            |
| C109E12 | Read | Type 2 diabetes mellitus with diabetic cataract             |
| C109F11 | Read | Type II diabetes mellitus with peripheral angiopathy        |
| C109F12 | Read | Type 2 diabetes mellitus with peripheral angiopathy         |
| C109G00 | Read | Non-insulin dependent diabetes mellitus with arthropathy    |
| C109G11 | Read | Type II diabetes mellitus with arthropathy                  |
| C109G12 | Read | Type 2 diabetes mellitus with arthropathy                   |
| C109H11 | Read | Type II diabetes mellitus with neuropathic arthropathy      |
| C109H12 | Read | Type 2 diabetes mellitus with neuropathic arthropathy       |
| C109J00 | Read | Insulin treated Type 2 diabetes mellitus                    |
| C109J11 | Read | Insulin treated non-insulin dependent diabetes mellitus     |
| C109J12 | Read | Insulin treated Type II diabetes mellitus                   |
| C109K00 | Read | Hyperosmolar non-ketotic state in type 2 diabetes mellitus  |
| C10F.00 | Read | Type 2 diabetes mellitus                                    |
| C10F000 | Read | Type 2 diabetes mellitus with renal complications           |
| C10F011 | Read | Type II diabetes mellitus with renal complications          |
| C10F100 | Read | Type 2 diabetes mellitus with ophthalmic complications      |
| C10F.11 | Read | Type II diabetes mellitus                                   |
| C10F111 | Read | Type II diabetes mellitus with ophthalmic complications     |
| C10F200 | Read | Type 2 diabetes mellitus with neurological complications    |
| C10F211 | Read | Type II diabetes mellitus with neurological complications   |
| C10F300 | Read | Type 2 diabetes mellitus with multiple complications        |
| C10F311 | Read | Type II diabetes mellitus with multiple complications       |
| C10F400 | Read | Type 2 diabetes mellitus with ulcer                         |
| C10F411 | Read | Type II diabetes mellitus with ulcer                        |
| C10F500 | Read | Type 2 diabetes mellitus with gangrene                      |
| C10F511 | Read | Type II diabetes mellitus with gangrene                     |
| C10F600 | Read | Type 2 diabetes mellitus with retinopathy                   |
| C10F611 | Read | Type II diabetes mellitus with retinopathy                  |
| C10F700 | Read | Type 2 diabetes mellitus - poor control                     |
| C10F711 | Read | Type II diabetes mellitus - poor control                    |
| C10F900 | Read | Type 2 diabetes mellitus without complication               |
| C10F911 | Read | Type II diabetes mellitus without complication              |
| C10FA00 | Read | Type 2 diabetes mellitus with mononeuropathy                |



|         |      |                                                             |
|---------|------|-------------------------------------------------------------|
| C10FA11 | Read | Type II diabetes mellitus with mononeuropathy               |
| C10FB00 | Read | Type 2 diabetes mellitus with polyneuropathy                |
| C10FB11 | Read | Type II diabetes mellitus with polyneuropathy               |
| C10FC00 | Read | Type 2 diabetes mellitus with nephropathy                   |
| C10FC11 | Read | Type II diabetes mellitus with nephropathy                  |
| C10FD00 | Read | Type 2 diabetes mellitus with hypoglycaemic coma            |
| C10FD11 | Read | Type II diabetes mellitus with hypoglycaemic coma           |
| C10FE00 | Read | Type 2 diabetes mellitus with diabetic cataract             |
| C10FE11 | Read | Type II diabetes mellitus with diabetic cataract            |
| C10FF00 | Read | Type 2 diabetes mellitus with peripheral angiopathy         |
| C10FF11 | Read | Type II diabetes mellitus with peripheral angiopathy        |
| C10FG11 | Read | Type II diabetes mellitus with arthropathy                  |
| C10FH00 | Read | Type 2 diabetes mellitus with neuropathic arthropathy       |
| C10FH11 | Read | Type II diabetes mellitus with neuropathic arthropathy      |
| C10FJ00 | Read | Insulin treated Type 2 diabetes mellitus                    |
| C10FJ11 | Read | Insulin treated Type II diabetes mellitus                   |
| C10FK00 | Read | Hyperosmolar non-ketotic state in type 2 diabetes mellitus  |
| C10FK11 | Read | Hyperosmolar non-ketotic state in type II diabetes mellitus |
| C10FL00 | Read | Type 2 diabetes mellitus with persistent proteinuria        |
| C10FL11 | Read | Type II diabetes mellitus with persistent proteinuria       |
| C10FM00 | Read | Type 2 diabetes mellitus with persistent microalbuminuria   |
| C10FM11 | Read | Type II diabetes mellitus with persistent microalbuminuria  |
| C10FN00 | Read | Type 2 diabetes mellitus with ketoacidosis                  |
| C10FN11 | Read | Type II diabetes mellitus with ketoacidosis                 |
| C10FP00 | Read | Type 2 diabetes mellitus with ketoacidotic coma             |
| C10FQ00 | Read | Type 2 diabetes mellitus with exudative maculopathy         |
| C10FR00 | Read | Type 2 diabetes mellitus with gastroparesis                 |

## Supplemental References

- 1 Hippisley-Cox J, Coupland C. Development and validation of QDiabetes-2018 risk prediction algorithm to estimate future risk of type 2 diabetes: cohort study. *BMJ* 2017;359:j5019. doi:10.1136/bmj.j5019
- 2 Wei L, Lai EC-C, Kao-Yang Y-H, *et al.* Incidence of type 2 diabetes mellitus in men receiving steroid 5 $\alpha$ -reductase inhibitors: population based cohort study. *BMJ* 2019;365:l1204. doi:10.1136/bmj.l1204
- 3 Booth H, Khan O, Prevost T, *et al.* Incidence of type 2 diabetes after bariatric surgery: population-based matched cohort study. *Lancet Diabetes Endocrinol* 2014;2:963–8. doi:10.1016/s2213-8587(14)70214-1
- 4 American Diabetes Association Professional Practice Committee. Classification and Diagnosis of Diabetes: Standards of Medical Care in Diabetes—2022. *Diabetes Care* 2022;45:S83–96. doi:10.2337/dc22-S006
- 5 Hippisley-Cox J, Coupland C. Derivation and validation of updated QFracture algorithm to predict risk of osteoporotic fracture in primary care in the United Kingdom: prospective open cohort study. *BMJ* 2012;344:e3427. doi:10.1136/bmj.e3427
- 6 Textor J, van der Zander B, Gilthorpe MS, *et al.* Robust causal inference using directed acyclic graphs: the R package ‘dagitty’. *Int J Epidemiol* 2017;45:1887-94. doi:10.1093/ije/dyw341
- 7 Suissa S, Moodie EEM, Dell’Aniello S. Prevalent new-user cohort designs for comparative drug effect studies by time-conditional propensity scores. *Pharmacoepidemiol Drug Saf* 2017;26:459–68. doi:10.1002/pds.4107
- 8 Douros A, Dell’Aniello S, Yu OHY, *et al.* Sulfonylureas as second line drugs in type 2 diabetes and the risk of cardiovascular and hypoglycaemic events: population based cohort study. *BMJ* 2018;362:k2693. doi:10.1136/bmj.k2693
- 9 Hayes KN, Brown KA, Cheung AM, *et al.* Comparative Fracture Risk During Osteoporosis Drug Holidays After Long-Term Risedronate Versus Alendronate Therapy: A Propensity Score–Matched Cohort Study. *Ann Intern Med* 2022;175:335-43. doi:10.7326/M21-2512
- 10 Rubin DB. *Multiple Imputation for Nonresponse in Surveys*. New York:Wiley 1987. doi:10.1002/9780470316696
- 11 White IR, Royston P. Imputing missing covariate values for the Cox model. *Stat Med* 2009;28:1982–98. doi:10.1002/sim.3618
- 12 Austin PC, Cafri G. Variance estimation when using propensity-score matching with replacement with survival or time-to-event outcomes. *Statistics in Medicine* 2020;39:1623–40. doi:10.1002/sim.8502
- 13 Austin PC, Stuart EA. The performance of inverse probability of treatment weighting and full matching on the propensity score in the presence of model misspecification when estimating the effect of treatment on survival outcomes. *Stat Methods Med Res* 2017;26:1654–70. doi:10.1177/0962280215584401
